# Supplementary material for: RBM15 facilitates laryngeal squamous cell carcinoma progression by regulating TMBIM6 stability through IGF2BP3 dependent
Source: PubMed Central journal article supplement (PMC7912894; doi:10.1186/s13046-021-01871-4), 2021-02-26
Supplement: 13046_2021_1871_MOESM1_ESM.pdf [file 13046_2021_1871_MOESM1_ESM.pdf]

**Table S1.** Primers used in the study.

| Gene   | Sequences                          | Applications |
|--------|------------------------------------|--------------|
| TMBIM6 | F: 5'-TCATATAACCCCGTCAACGC-3'      | MeRIP -qPCR  |
|        | R: 5'-CAAATCCAGCAAGAAGTCCC-3'      |              |
| ATAD3A | F: 5'-TTTCCGTCACCCGTTTGC-3'        | MeRIP -qPCR  |
|        | R: 5'-ATTCAGGGCGTCCTTGGC-3'        |              |
| CASP9  | F: 5'-GGTCGCTAATGCTGTTTCGGT-3'     | MeRIP -qPCR  |
|        | R: 5'-GTGCAAGATAAGGCAGGGTGAG-3'    |              |
| MAP3K6 | F: 5'-GTGCTTCCCCAGCGTAGG-3'        | MeRIP -qPCR  |
|        | R: 5'-TCCGTGTACTCATAATCAAACCTCC-3' |              |
| CPNE5  | F: 5'-CCCCTCCTCAATTTCTTGG-3'       | MeRIP -qPCR  |
|        | R: 5'-GTACCCCTCTTTCACCCGT-3'       |              |
| HMG20A | F: 5'-CCTTCCCCCTCCTTAGTGA-3'       | MeRIP -qPCR  |
|        | R: 5'-TCTGTGAATAGCCACCGCA-3'       |              |
| RBM15  | F: 5'-GGCTGCCTGAGGAGAGTGGAG-3'     | qRT-PCR      |
|        | R: 5'-CGGCTACTGCTCAATTCTGGACTG-3'  |              |
| TMBIM6 | F: 5'-GCACGGACTCTGGAACCATGAAC-3'   | qRT-PCR      |
|        | R: 5'-GCAGCCGCCACAAACATACAAAG-3'   |              |
| ATAD3A | F: 5'-ATCAATGAGATGGTCCACTTCG-3'    | qRT-PCR      |
|        | R: 5'-CCGGCTTAAGAACATACTTGTC-3'    |              |
| CASP9  | F: 5'-GACCAGAGATTCGCAAACCGAGAGG-3' | qRT-PCR      |
|        | R: 5'-AAGAGCACCGACATCACCAAATCC-3'  |              |

---

|             |                                                                     |             |
|-------------|---------------------------------------------------------------------|-------------|
| MAP3K6      | F: 5'-CTCTACAGCGGCTGAATGAG-3'<br>R: 5'-TGAATCCACATTCAGTTCCTGT-3'    | qRT-PCR     |
| CPNE5       | F: 5'-AAAGACATGTTTTCCAAGTCCG-3'<br>R: 5'-ACGTCGTATAGATCAAAACGGA-3'  | qRT-PCR     |
| HMG20A      | F: 5'-GGAGAGTAATGATCTGGCTACC-3'<br>R: 5'-ACAAATTCTGGATTGTTGGTGG-3'  | qRT-PCR     |
| IGF2BP3     | F: 5'-GAGGCGCTTTCAGGTAAAATAG-3'<br>R: 5'-AATGAGGCGGGATATTTTCGTAT-3' | qRT-PCR     |
| GAPDH       | F: 5'-TGAACGGGAAGCTCACTGG-3'<br>R: 5'-TCCACCACCCTGTTGCTGTA-3'       | qRT-PCR     |
| TMBIM6-2222 | F: 5' TTCAGTGTGAGAGGATCGAGC 3'<br>R: 5' CTGAGGCCACTGTGTCAAAC 3'     | MeRIP -qPCR |
| CPNE5-1572  | F: 5' CCATGAAGCTGATGGGTTTG 3'<br>R: 5' ATGGCCTACGGTCCATGATTA 3'     | MeRIP -qPCR |

---

Abbreviation: ATAD3A: ATPase family AAA domain containing 3A; CASP9: caspase 9; CPNE5: copine 5; GAPDH, glyceraldehyde-3-phosphate dehydrogenase; HMG20A: high mobility group 20A; IGF2BP3: insulin like growth factor 2 mRNA binding protein 3; MAP3K6: mitogen-activated protein kinase kinase kinase 6; RBM15: RNA binding motif protein 15; TMBIM6: transmembrane BAX inhibitor motif containing 6
