# Supplementary material for: RBM15 facilitates laryngeal squamous cell carcinoma progression by regulating TMBIM6 stability through IGF2BP3 dependent
Source: PubMed Central journal article supplement (PMC7912894; doi:10.1186/s13046-021-01871-4), 2021-02-26
Supplement: 13046_2021_1871_MOESM3_ESM.pdf [file 13046_2021_1871_MOESM3_ESM.pdf]

**Table S2.** The top 6 mRNAs with differential m6A methylation modifications were screened out.

---

| Gene   | Foldchange(log2-Scaled) | P-value(paired t-test) |
|--------|-------------------------|------------------------|
| TMBIM6 | 0.649519554             | 0.033421116            |
| ATAD3A | 0.626995376             | 0.049728946            |
| CASP9  | 0.667971081             | 0.033006025            |
| MAP3K6 | 0.617107056             | 0.000669577            |
| CPNE5  | 0.614209974             | 0.020752312            |
| HMG20A | 0.736722214             | 0.029893781            |

---

Abbreviation: ATAD3A: ATPase family AAA domain containing 3A; CASP9: caspase 9; CPNE5: copine 5; HMG20A: high mobility group 20A; MAP3K6: mitogen-activated protein kinase kinase kinase 6; TMBIM6: transmembrane BAX inhibitor motif containing 6;
