# Supplementary material for: RBM15 facilitates laryngeal squamous cell carcinoma progression by regulating TMBIM6 stability through IGF2BP3 dependent
Source: PubMed Central journal article supplement (PMC7912894; doi:10.1186/s13046-021-01871-4), 2021-02-26
Supplement: 13046_2021_1871_MOESM8_ESM.pdf [file 13046_2021_1871_MOESM8_ESM.pdf]

**Figure S6**

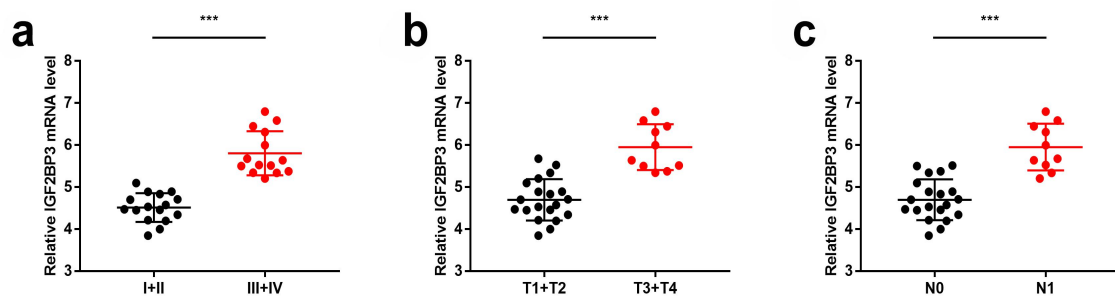

**Figure S6.** a-c The relationship between the expression level of IGF2BP3 and clinicopathological characteristics in LSCC patients.
